# Supplementary material
Source: Springer Nature journal article supplement (https://www.springermedizin.de/resource/supplementary/12887_2013_965_MOESM1_ESM.pdf/9476768)
Supplement: MOESM1 [file 9476768]

## 1) Dalteparin, IVIG, and Aspirin Regimen

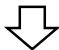

IVIG at 2.0 g/kg/d over 12 h

OR

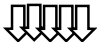

IVIG at 400 mg/kg/d for 5 d

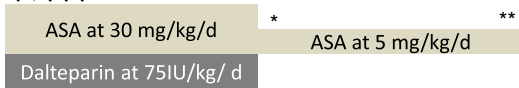

## 2) Dalteparin and Aspirin Regimen

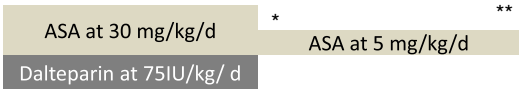

The day of illness 4 5 6 7 8

30
